# Supplementary material for: Investigation of the Photocatalytic Performance, Mechanism, and Degradation Pathways of Rhodamine B with Bi2O3 Microrods under Visible-Light Irradiation
Source: MDPI journal article supplement (doi:10.3390/ma17040957), 2024-02-19
Supplement: s1 [file s1]

# Investigation of the Photocatalytic Performance, Mechanism, and Degradation Pathways of Rhodamine B with Bi<sub>2</sub>O<sub>3</sub> Microrods under Visible-Light Irradiation

Dechong Ma <sup>1,2,\*</sup>, Jiawei Tang <sup>1</sup>, Guowen He <sup>1,2</sup> and Sai Pan <sup>1,2</sup>

<sup>1</sup> College of Materials and Chemical Engineering, Hunan City University, Yiyang 413000, China; hnucityjw@163.com (J.T.); guowenh666@163.com (G.H.); saipan1985@163.com (S.P.)

<sup>2</sup> Key Laboratory of Low Carbon and Environmental Functional Materials of College of Hunan Province, Hunan City University, Yiyang 413000, China

\* Correspondence: madechong@hncu.edu.cn or mars.dc@163.com

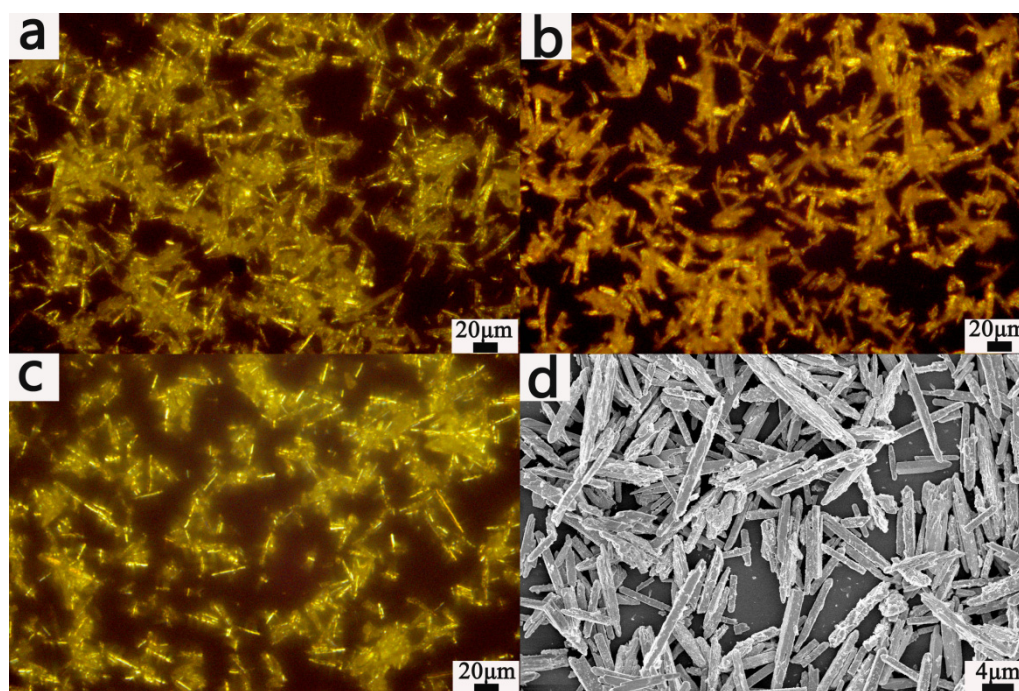

**Figure S1.** POM (a–c) images of microrods obtained at different reaction temperatures: (a) 70 °C, ( b ) 75 °C, and (c) 80 °C; (d) SEM images of microrods at a reaction temperature of 80 °C.

Figure S1 shows POM and SEM images of the  $\text{Bi}_2\text{O}_3$  microrods prepared at different temperatures with a reaction time of 50 min. As the reaction temperature increased, the rod-shaped  $\text{Bi}_2\text{O}_3$  crystals became shorter and had more obvious small particles on their surface, especially at the two ends of the rod, as Figure S1b and c show. Figure S1d displays an SEM image of the products prepared at 80 °C, and we can see that the products consisted of microrods and irregular particles. The as-obtained  $\text{Bi}_2\text{O}_3$  microrods were about 2–4  $\mu\text{m}$  in diameter and 40  $\mu\text{m}$  in length.

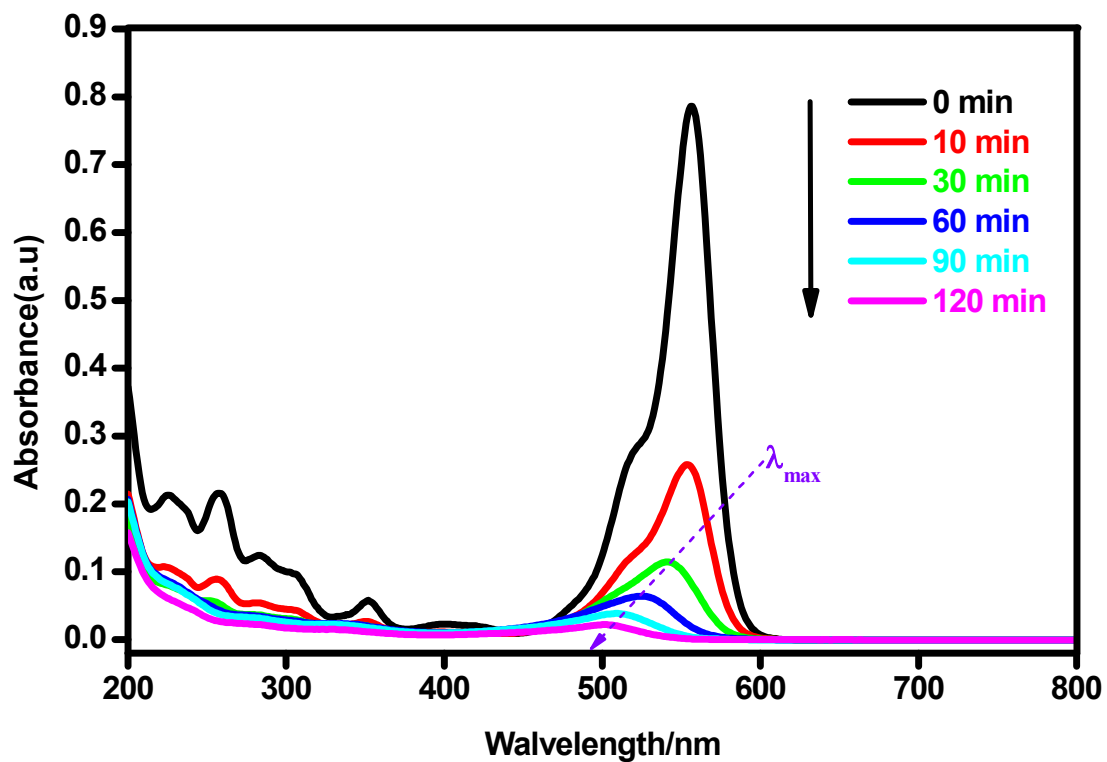

**Figure S2.** UV–visible spectral changes in the RhB solution with  $\text{Bi}_2\text{O}_3$  microrods as photocatalysts.

Figure S2 shows that the maximum wave peak of RhB shifted blue, and the maximum absorbance gradually decreases with the increase in illumination time.

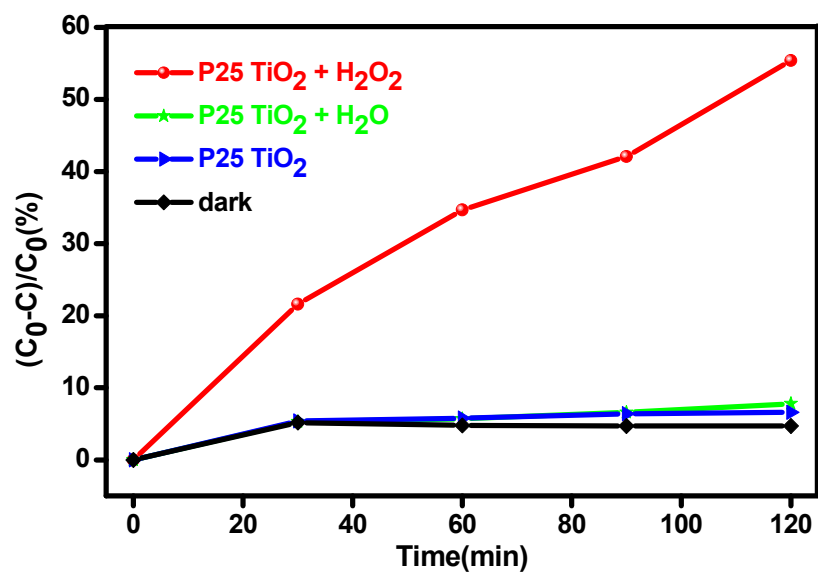

**Figure S3.** Photodecomposition curves of RhB solutions under visible-light irradiation with P25 TiO<sub>2</sub> photocatalysts.

No obvious photodegradation was detected in the contrast experiments using P25 TiO<sub>2</sub>+H<sub>2</sub>O and pure P25 TiO<sub>2</sub> under visible light, as shown in Figure S3. Remarkably, the photocatalytic degradation of RhB with the P25 TiO<sub>2</sub>+H<sub>2</sub>O<sub>2</sub> sample was efficient, and nearly 56% of the RhB was removed after 120 min of irradiation, which indicated the excellent visible-light-driven photocatalytic performance of P25 TiO<sub>2</sub>+H<sub>2</sub>O<sub>2</sub>.

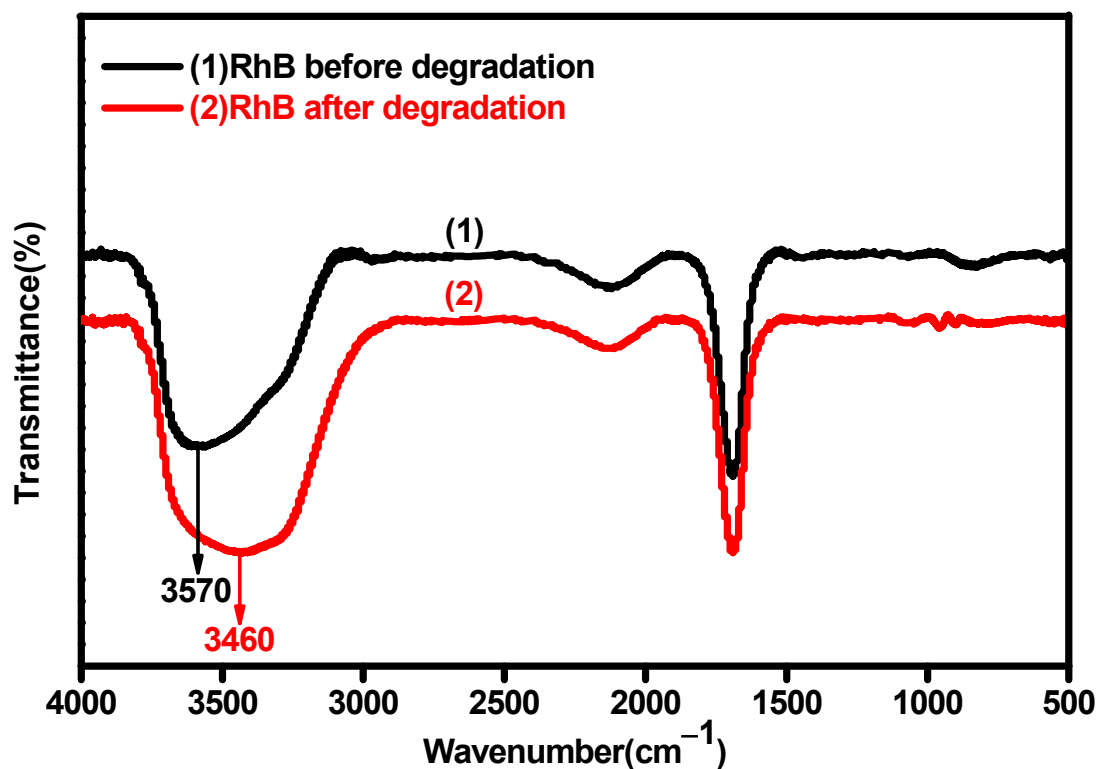

**Figure S4.** The FTIR spectra of pre-degradation and post-degradation RhB solution with  $\text{Bi}_2\text{O}_3$  microrods as photocatalysts.

Comparing the FTIR spectra before and after RhB degradation, we found significant changes in the spectral range of  $3600\text{--}3200\text{ cm}^{-1}$ , as shown in Figure S4. As shown in Figure S4, the peak of pre-degradation and post-degradation RhB showed that the absorption bands at approximately  $3570\text{ cm}^{-1}$  and around  $3460\text{ cm}^{-1}$  were assigned to the presence of hydrogen bonds with C–H/O–H groups in the pure state and stretching vibrations corresponding to –HN– and –HNC– groups respectively, which indicated the process of N-deethylation.
